# Supplementary material for: Novel Zebrafish Patient-Derived Tumor Xenograft Methodology for Evaluating Efficacy of Immune-Stimulating BCG Therapy in Urinary Bladder Cancer
Source: MDPI journal article supplement (doi:10.3390/cells12030508), 2023-02-03
Supplement: s1 [file s1]

## Supplemental information

Supplemental Table S1: Calculated BCG:cell ratios for each concentration:

| BCG concentration / ml | Cell number/ml | BCG:cell ratio |
|------------------------|----------------|----------------|
| $3 \times 10^7$        | ~300 cells     | ~1:10          |
| $4.5 \times 10^7$      |                | ~1:7.5         |
| $6 \times 10^7$        |                | ~1:5           |
| $1.2 \times 10^8$      |                | ~1:2.5         |
